# Supplementary material
Source: PubMed Central journal article supplement (PMC5576885)

Supplementary figure 1

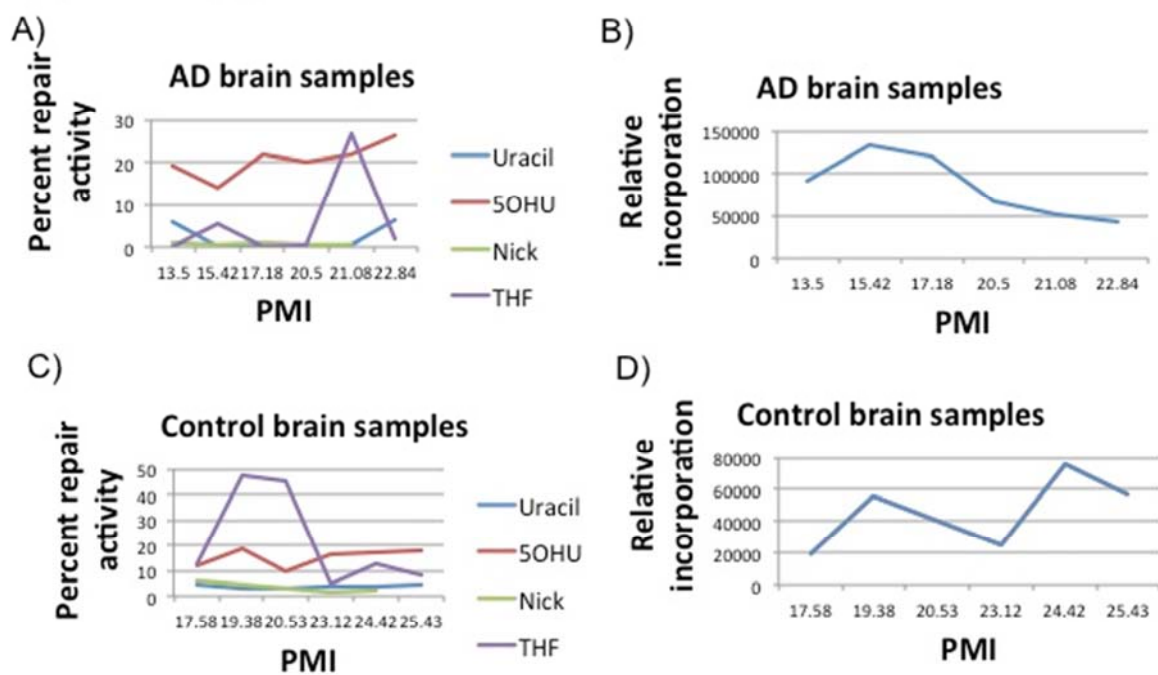

Supplement: NIHMS562617-supplement-01.pdf [file NIHMS562617-supplement-01.pdf]
